# Supplementary material
Source: publisher figshare collection journal article supplement (https://springernature.figshare.com/ndownloader/files/21101865)
Supplement: Supplementary file [file 21101865]

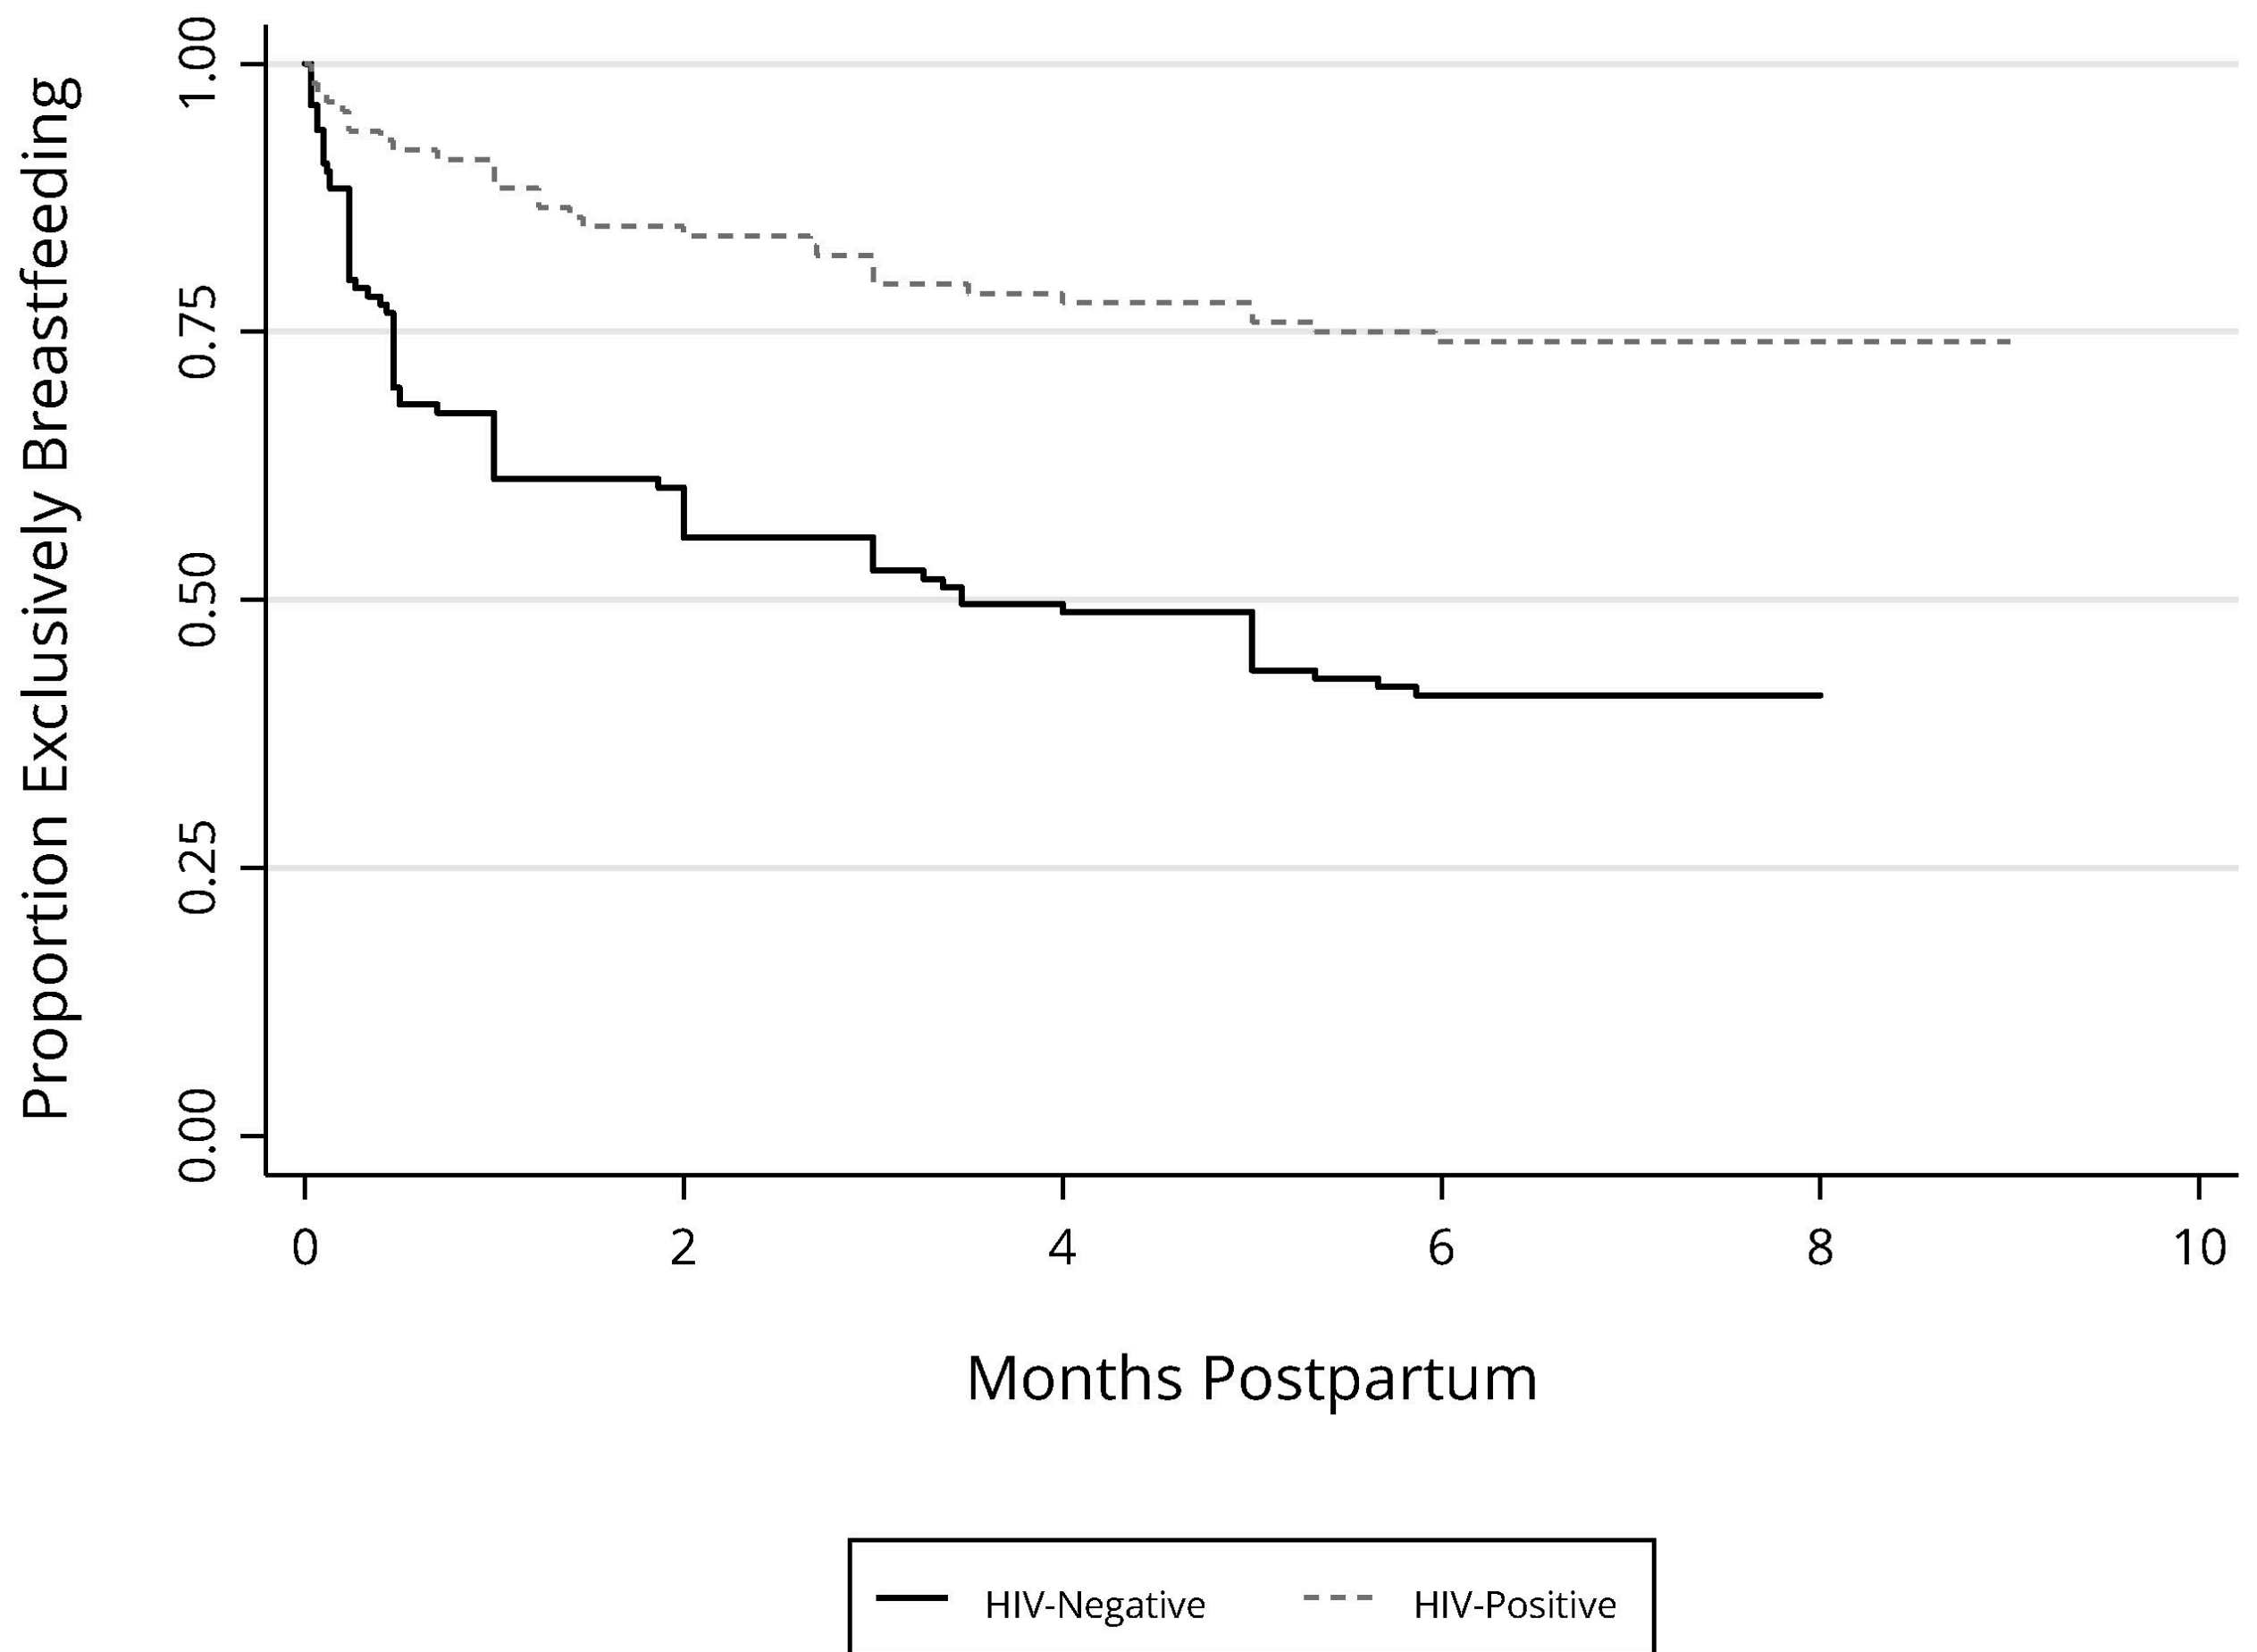

**Supplementary Figure 3.** Proportion of women (n=275) exclusively breastfeeding through 9 months postpartum, by maternal HIV status. Being HIV-positive was associated with a 64.0% decrease in the likelihood of early exclusive breastfeeding cessation to 6 months .
